# Supplementary material for: Co-decorated Cu alloy catalyst for C2 oxygenate and ethanol formation from syngas on Cu-based catalyst: insight into the role of Co and Cu as well as the improved selectivity
Source: Royal Society of Chemistry journal article supplement (doi:10.1039/c6cy01239f), 2016-01-01
Supplement: c6cy01239f1.pdf [file c6cy01239f1.pdf]

# Co-decorated Cu Alloy Catalyst for C<sub>2</sub> Oxygenates and Ethanol Formations from Syngas on Cu-based Catalyst: Insight into the Role of Co and Cu, as well as the Improved Selectivity

Riguang Zhang, Fu Liu, Baojun Wang,\*

Key Laboratory of Coal Science and Technology of Ministry of Education and Shanxi Province, Taiyuan University of Technology, Taiyuan 030024, Shanxi, P.R. China

## 1. CH<sub>x</sub>(x=1-3) Formation on CoCu(211) Surface

### 1.1 CH Formation

CHO species adsorbed at the Co-Cu mixed site is the dominant product for CO initial activation on CoCu(211) surface; thus, starting from CHO and CHO+H species, four possible pathways with five reactions (**R6~10**) may be responsible for CH formation. Meanwhile, CHO hydrogenation to CH<sub>2</sub>O (**R11**) is also considered.

For **R6**, the direct C–O bond cleavage of CHO adsorbed at the bridge-SE-2 Co-Cu site can form CH and O via a transition state TS6, this elementary reaction requires an activation barrier of 169.2 kJ·mol<sup>-1</sup> with the reaction energy of -0.1 kJ·mol<sup>-1</sup>, and the reaction rate constant is 5.73×10<sup>-6</sup> s<sup>-1</sup> (*In the text, only the rate constants of all elementary reactions at the temperature of 500 K is presented, those at other temperatures are listed in Table 3*); in TS6, both CH and O species are adsorb at the hollow-2 and bridge-SE-2 sites, respectively, the C–O distance is elongated to 1.926 Å from 1.257 Å in CHO.

Starting from the initial state, CHO+H(1), the dissociation of CHO with H-assisted (**R7**) leads

---

\*Corresponding author at: No. 79 Yingze West Street, Taiyuan 030024, China. Tel.: +86 351 6018239; Fax: +86 351 6041237 E-mail address: [wangbaojun@tyut.edu.cn](mailto:wangbaojun@tyut.edu.cn); [wbj@tyut.edu.cn](mailto:wbj@tyut.edu.cn) (Baojun Wang)

to the formations of CH and OH species via a transition state TS7, this elementary reaction has an activation barrier of  $155.7 \text{ kJ}\cdot\text{mol}^{-1}$ , it is endothermic by  $12.9 \text{ kJ}\cdot\text{mol}^{-1}$ , and the reaction rate constant is  $8.14\times 10^{-4} \text{ s}^{-1}$ ; in TS7, CH and OH species are adsorbed at the Co-Cu bridge and bridge-SE-2 sites, respectively, in which the O–H distance is  $0.978 \text{ \AA}$ . Moreover, CHOH may be responsible for CH formation, thus, CHOH formation is firstly investigated.

For **R8**, CHO is hydrogenated to form CHOH via a transition state TS8, this elementary reaction has an activation barrier of  $133.0 \text{ kJ}\cdot\text{mol}^{-1}$ , it is endothermic by  $55.1 \text{ kJ}\cdot\text{mol}^{-1}$ , and the reaction rate constant is  $0.36 \text{ s}^{-1}$ ; in TS8, the O–H distance is decreased to  $1.399 \text{ \AA}$  from  $3.122 \text{ \AA}$  in CHO+H(1). Subsequently, CHOH direct dissociation (**R9**) and its dissociation with H-assisted (**R10**) have the activation barriers of  $102.0$  and  $188.1 \text{ kJ}\cdot\text{mol}^{-1}$  with the corresponding reaction energies of  $-42.2$  and  $25.2 \text{ kJ}\cdot\text{mol}^{-1}$ , respectively.

For **R11**, starting from CHO+H(2), CHO hydrogenation to  $\text{CH}_2\text{O}$  via a transition state TS11 has an activation barrier of  $47.7 \text{ kJ}\cdot\text{mol}^{-1}$ , this elementary reaction is slightly endothermic by  $3.3 \text{ kJ}\cdot\text{mol}^{-1}$ , and the reaction rate constant is  $7.14\times 10^8 \text{ s}^{-1}$ ; in TS11, CHO is adsorbed at the bridge-SE site via both C and O atoms, and H is adsorbed at the atop-SE site with the C–H distance of  $1.136 \text{ \AA}$ .

## 1.2 $\text{CH}_2$ Formation

Five possible pathways with six reactions (**R12~17**) may form  $\text{CH}_2$ . Our results show that for **R12** ( $\text{CHO}+\text{H}\rightarrow\text{CH}_2+\text{O}$ ), CHO prefers to be hydrogenated to  $\text{CH}_2\text{O}$ , then,  $\text{CH}_2\text{O}$  dissociates into  $\text{CH}_2$  and O. Meanwhile,  $\text{CH}_2\text{O}$  hydrogenation to  $\text{CH}_3\text{O}$  (**R18**) has been also considered.

For **R13**, the direct C–O bond cleavage of  $\text{CH}_2\text{O}$  can form  $\text{CH}_2$  and O via a transition state TS13, this elementary reaction is endothermic by  $9.7 \text{ kJ}\cdot\text{mol}^{-1}$  with an activation barrier of  $126.7 \text{ kJ}\cdot\text{mol}^{-1}$ , and the reaction rate constant is  $0.89 \text{ s}^{-1}$ ; in TS13, both  $\text{CH}_2$  and O species are adsorbed at two adjacent bridge-SE-2 site with the C–O distance of  $1.966 \text{ \AA}$ .

The dissociation of CH<sub>2</sub>O with H-assisted (**R14**) leads to the formation of CH<sub>2</sub> and OH species via a transition state TS14, this elementary reaction has an activation barrier of 96.2 kJ·mol<sup>-1</sup>, and it is slightly endothermic by 9.5 kJ·mol<sup>-1</sup> with the reaction rate constant of 1.88×10<sup>3</sup> s<sup>-1</sup>; in TS14, CH<sub>2</sub>O is adsorbed at the atop-SE site, both O and H are adsorbed at the bridge-SE-2 site; the distance between H and O atom is decreased to 0.979 Å from 2.509 Å in CH<sub>2</sub>O+H(1).

Similar to CHOH formation, CH<sub>2</sub>O hydrogenation to CH<sub>2</sub>OH (**R15**) has been firstly investigated. CH<sub>2</sub>O can be hydrogenated to form CH<sub>2</sub>OH via a transition state TS15 with an activation barrier of 108.3 kJ·mol<sup>-1</sup>, and this reaction is endothermic by 46.3 kJ·mol<sup>-1</sup> with the reaction rate constant of 2.03×10<sup>2</sup> s<sup>-1</sup>; in TS15, CH<sub>2</sub>O and H species are adsorbed at the atop-SE site, the distance between H and O atom is decreased to 1.283 Å from 2.509 Å in CH<sub>2</sub>O+H(1).

For **R16**, CH<sub>2</sub>OH direct dissociation into CH<sub>2</sub> and OH via a transition state TS16 has an activation barrier of 51.3 kJ·mol<sup>-1</sup>, and this elementary reaction is exothermic by 36.8 kJ·mol<sup>-1</sup> with the reaction rate constant of 3.17×10<sup>7</sup> s<sup>-1</sup>; in TS16, CH<sub>2</sub> and OH species are adsorbed at the atop-SE and bridge-SE-2 sites, respectively, the distance between C and O atom is decreased to 1.844 Å.

CH<sub>2</sub>OH dissociation with H-assisted (**R17**) via TS17 needs an activation barrier of 128.8 kJ·mol<sup>-1</sup> with the reaction energy of -7.6 kJ·mol<sup>-1</sup>, and the reaction rate constant is 0.93 s<sup>-1</sup>; in TS17, CH<sub>2</sub> and H are adsorbed at the bridge-SE-2 site, OH is adsorbed at the atop-SE site, the distance between H and O atom is decreased to 1.538 Å from 2.749 Å in CH<sub>2</sub>OH+H.

For **R18**, CH<sub>2</sub>O can be hydrogenated to form CH<sub>3</sub>O via a transition state TS18 with an activation barrier of 29.2 kJ·mol<sup>-1</sup>, this elementary reaction is slightly endothermic by 3.4 kJ·mol<sup>-1</sup> with the reaction rate constant of 2.92×10<sup>10</sup> s<sup>-1</sup>; in TS18, CH<sub>2</sub>O adsorbs at the bridge-SE-2 site via C and O atom, and H adsorbs at the atop-SE site with the distances between C and H atom of 1.429 Å.

### 1.3 CH<sub>3</sub> Formation

Similarly, three possible pathways (**R19~21**) are responsible for CH<sub>3</sub> formation. CH<sub>3</sub>O hydrogenation to CH<sub>3</sub>OH (**R22**) is also considered.

For **R19**, the dissociation of CH<sub>2</sub>O with H-assisted leads to the formation of CH<sub>3</sub> and O via a transition state TS19 with an activation barrier of 110.6 kJ·mol<sup>-1</sup>, and this elementary reaction is exothermic by 12.3 kJ·mol<sup>-1</sup> with the reaction rate constant of 6.22 s<sup>-1</sup>; in TS19, CH<sub>2</sub> and H adsorb at the atop-SE site, O adsorbs at the bridge-SE-2 site, the distance between C and H atom is 1.116 Å.

For **R20**, the direct C–O bond cleavage of CH<sub>3</sub>O via a transition state TS20 has an activation barrier of 111.5 kJ·mol<sup>-1</sup> with the reaction energy of -15.7 kJ·mol<sup>-1</sup>, and the reaction rate constant is 4.08×10<sup>2</sup> s<sup>-1</sup>; in TS20, CH<sub>3</sub> is adsorbed at the atop-SE site, and O is adsorbed at the bridge-SE-2 site with the C–O distance of 1.878 Å.

For **R21**, the dissociation of CH<sub>3</sub>O with H-assisted leads to the formations of CH<sub>3</sub> and OH species via a transition state TS21, this elementary reaction has an activation barrier of 92.8 kJ·mol<sup>-1</sup>, and it is exothermic by 30.5 kJ·mol<sup>-1</sup> with the reaction rate constant of 8.95×10<sup>3</sup> s<sup>-1</sup>; in TS21, CH<sub>3</sub> and H are adsorbed at the atop-SE site, O is adsorbed at the bridge-SE-2 site, and the distance between the C and O is 1.915 Å.

For **R22**, CH<sub>3</sub>O hydrogenation to CH<sub>3</sub>OH via a transition state TS22 has an activation barrier of 103.5 kJ·mol<sup>-1</sup>, this elementary reaction is endothermic by 45.1 kJ·mol<sup>-1</sup>, and the reaction rate constant is 5.01×10<sup>2</sup> s<sup>-1</sup>. In TS22, CH<sub>3</sub>O is adsorbed at the bridge-SE-2 site via O atom, and H is adsorbed at the atop-SE site with the distances between H and O atom of 1.325 Å.

## 2. The Formations of C<sub>2</sub> Hydrocarbons and Oxygenates

Starting from the most favorable CH<sub>x</sub> monomers, CH<sub>2</sub> and CH<sub>3</sub> species, all possible reactions related to CH<sub>2</sub> and CH<sub>3</sub> species including the dissociation, hydrogenation, coupling and CO/CHO insertion have been examined.

Starting from CH<sub>2</sub> species, CH<sub>2</sub> dissociation into CH and H (**R23**) via a transition state TS23 has an activation barrier and reaction energy of 41.1 and 5.8 kJ·mol<sup>-1</sup>, respectively, and the reaction rate constant is 1.93×10<sup>8</sup> s<sup>-1</sup>; in TS23, CH is adsorbed at the hollow-2 site, and H is adsorbed at the atop-SE Co site with the C–H distance of 1.633 Å.

CH<sub>2</sub> hydrogenation to CH<sub>3</sub> (**R24**) via a transition state TS24 has an activation barrier of 19.0 kJ·mol<sup>-1</sup>, and it is exothermic by 25.6 kJ·mol<sup>-1</sup> with the reaction rate constant of 6.09×10<sup>10</sup> s<sup>-1</sup>; in TS24, CH<sub>2</sub> is adsorbed at the bridge-SE-2 Co-Cu site, H is adsorbed at the atop-SE Co site; the distance between C and H atom is decreased to 1.705 Å from 2.349 Å in CH<sub>2</sub>+H.

For **R25**, CH<sub>2</sub> coupling leads to C<sub>2</sub>H<sub>4</sub> via a transition state TS25, this elementary reaction needs an activation barrier of 17.7 kJ·mol<sup>-1</sup>, and it is strongly exothermic by 104.5 kJ·mol<sup>-1</sup> with the reaction rate constant of 1.96×10<sup>11</sup> s<sup>-1</sup>; in TS25, both CH<sub>2</sub> are adsorbed at the bridge-SE-2 Co-Cu sites, the distance between two C atom is decreased to 2.219 Å from 2.716 Å in CH<sub>2</sub>+CH<sub>2</sub>.

For **R26**, CO insertion into CH<sub>2</sub> can form CH<sub>2</sub>CO via a transition state TS26, this elementary reaction is slightly endothermic by 12.1 kJ·mol<sup>-1</sup> with an activation barrier of 39.9 kJ·mol<sup>-1</sup> and the reaction rate constant of 9.07×10<sup>8</sup> s<sup>-1</sup>; in TS26, CH<sub>2</sub> and CO species are adsorbed at the bridge-SE-2 Co-Cu site and atop-SE Co site, respectively, the distance between C<sub>1</sub> and C<sub>2</sub> atoms is decreased to 1.805 Å from 2.474 Å in CH<sub>2</sub>+CO.

For **R27**, CHO insertion into CH<sub>2</sub> to CH<sub>2</sub>CHO has an activation barrier of 24.7 kJ·mol<sup>-1</sup> with the reaction energy of -91.9 kJ·mol<sup>-1</sup>, and the reaction rate constant is 4.30×10<sup>10</sup> s<sup>-1</sup>; in TS27, CH<sub>2</sub> and CHO species are adsorbed at the bridge-SE-2 Co-Cu sites with the distance between C<sub>1</sub> and C<sub>2</sub> atoms of 2.025 Å.

Starting from CH<sub>3</sub> species, in **R28**, CH<sub>3</sub> dissociation into CH<sub>2</sub> and H has an activation barrier and reaction energy of 44.6 and 25.6 kJ·mol<sup>-1</sup>, respectively, and the reaction rate constant is

$5.45 \times 10^7 \text{ s}^{-1}$ ; TS28 has been presented in the reaction of  $\text{CH}_2 + \text{H} \rightarrow \text{CH}_3$  (**R23**).

For **R29**,  $\text{CH}_3$  hydrogenation can from  $\text{CH}_4$  via a transition state TS29, this elementary reaction is slightly exothermic by  $0.2 \text{ kJ}\cdot\text{mol}^{-1}$  with an activation barrier of  $87.3 \text{ kJ}\cdot\text{mol}^{-1}$ , and the reaction rate constant is  $3.23 \times 10^4 \text{ s}^{-1}$ ; in TS29,  $\text{CH}_3$  and H species are adsorbed at the bridge-SE-2 Co-Cu sites; the distance between C and H atom is decreased to  $1.477 \text{ \AA}$  from  $2.425 \text{ \AA}$  in the initial state,  $\text{CH}_3 + \text{H}$ .

For **R30**,  $\text{CH}_3$  coupling to  $\text{C}_2\text{H}_6$  via a transition state TS30 has an activation barrier of  $156.2 \text{ kJ}\cdot\text{mol}^{-1}$ , and it is exothermic by  $39.4 \text{ kJ}\cdot\text{mol}^{-1}$  with the reaction rate constant of  $2.41 \times 10^{-2} \text{ s}^{-1}$ ; in TS30, one  $\text{CH}_3$  is adsorbed at the atop-SE site, the other is pre-adsorbed at the bridge-SE-2 site, the distance of two C atoms is decreased to  $2.439 \text{ \AA}$ .

For **R31**, CO insertion into  $\text{CH}_3$  can form  $\text{CH}_3\text{CO}$  via a transition state TS31, this elementary reaction is endothermic by  $30.4 \text{ kJ}\cdot\text{mol}^{-1}$  with an activation barrier of  $83.1 \text{ kJ}\cdot\text{mol}^{-1}$ , and the reaction rate constant is  $1.30 \times 10^5 \text{ s}^{-1}$ ; in TS31,  $\text{CH}_3$  adsorbs at the atop-SE Co site, CO adsorbs at the bridge-SE-2 Co-Cu site, the distance between  $\text{C}_1$  and  $\text{C}_2$  atom is decreased to  $1.833 \text{ \AA}$  from  $2.584 \text{ \AA}$  in  $\text{CH}_3 + \text{CO}$ .

For **R32**, CHO insertion into  $\text{CH}_3$  to  $\text{CH}_3\text{CHO}$  has an activation barrier of  $41.1 \text{ kJ}\cdot\text{mol}^{-1}$  with the reaction energy of  $-66.8 \text{ kJ}\cdot\text{mol}^{-1}$ , and the reaction rate constant is  $3.56 \times 10^9 \text{ s}^{-1}$ ; in TS32,  $\text{CH}_3$  is adsorbed at the atop-SE Co site, and CHO is adsorbed at the bridge Co-Cu site with the distance between  $\text{C}_1$  and  $\text{C}_2$  atoms of  $1.976 \text{ \AA}$ .

### 3. Ethanol Formation

Since  $\text{CH}_2\text{CO}$  and  $\text{CH}_3\text{CO}$  are the dominant  $\text{C}_2$  oxygenates, both can be successively hydrogenated to  $\text{C}_2\text{H}_5\text{OH}$ .

Starting from  $\text{CH}_2\text{CO}$ , three possible pathways exist. Firstly,  $\text{CH}_2\text{CO}$  hydrogenation to  $\text{CH}_3\text{CO}$

(**R33**) has an activation barrier of  $53.0 \text{ kJ}\cdot\text{mol}^{-1}$  with the reaction energy of  $13.6 \text{ kJ}\cdot\text{mol}^{-1}$ , and the rate constant is  $4.67\times 10^7 \text{ s}^{-1}$ ; in TS33,  $\text{CH}_2\text{CO}$  and H are adsorbed at two adjacent the bridge-SE-2 Co-Cu sites; the distance between  $\text{C}_2$  and H atom is decreased to  $1.691 \text{ \AA}$  from  $2.699 \text{ \AA}$  in the initial state,  $\text{CH}_2\text{CO}+\text{H}(1)$ . Secondly,  $\text{CH}_2\text{CO}$  hydrogenation to  $\text{CH}_2\text{CHO}$  (**R34**) via a transition state TS34, and this elementary reaction needs to overcome an activation barrier of  $59.4 \text{ kJ}\cdot\text{mol}^{-1}$  with the reaction energy of  $-0.5 \text{ kJ}\cdot\text{mol}^{-1}$ , and the rate constant is  $3.11\times 10^6 \text{ s}^{-1}$ ; in TS34,  $\text{CH}_2\text{CO}$  is adsorbed at the bridge-SE-2 Co-Cu site, and H is adsorbed at the atop-SE Co site; the distance between  $\text{C}_1$  and H atom is decreased to  $1.339 \text{ \AA}$  from  $2.428 \text{ \AA}$  in the initial state,  $\text{CH}_2\text{CO}+\text{H}(1)$ . Thirdly,  $\text{CH}_2\text{CO}$  hydrogenation to  $\text{CH}_2\text{COH}$  (**R35**) via a transition state TS35, and this elementary reaction needs to overcome an activation barrier of  $128.6 \text{ kJ}\cdot\text{mol}^{-1}$  with the reaction energy of  $69.1 \text{ kJ}\cdot\text{mol}^{-1}$ , and the rate constant is  $3.04 \text{ s}^{-1}$ ; in TS35,  $\text{CH}_2\text{CO}$  is adsorbed at the atop-SE Co site, and H is adsorbed at the atop-SE Cu site; the distance between O and H atom is decreased to  $1.434 \text{ \AA}$  from  $2.813 \text{ \AA}$  in the initial state,  $\text{CH}_2\text{CO}+\text{H}(2)$ .

Based on the kinetic data,  $\text{CH}_2\text{CO}$  prefers to be hydrogenated to  $\text{CH}_2\text{CHO}$  and  $\text{CH}_3\text{CO}$ , thus,  $\text{CH}_2\text{CHO}$  and  $\text{CH}_3\text{CO}$  further hydrogenation have also been further calculated.

Starting from  $\text{CH}_2\text{CHO}$ , there are two possible pathways for hydrogenation. One is  $\text{CH}_2\text{CHO}$  hydrogenation to  $\text{CH}_3\text{CHO}$  (**R36**) via a transition state TS36, and this elementary reaction needs to overcome an activation barrier of  $42.9 \text{ kJ}\cdot\text{mol}^{-1}$  with the reaction energy of  $0.1 \text{ kJ}\cdot\text{mol}^{-1}$ , and the rate constant is  $1.36\times 10^{10} \text{ s}^{-1}$ ; in TS36,  $\text{CH}_2\text{CHO}$  and H are adsorbed at two adjacent bridge-SE-2 Co-Cu sites; the distance between  $\text{C}_2$  and H atom is decreased to  $1.571 \text{ \AA}$  from  $2.393 \text{ \AA}$  in the initial state,  $\text{CH}_2\text{CHO}+\text{H}(1)$ . The other is  $\text{CH}_2\text{CHO}$  hydrogenation to  $\text{CH}_2\text{CHOH}$  (**R37**) via a transition state TS37, which is less favorable than  $\text{CH}_2\text{CHO}$  hydrogenation to  $\text{CH}_3\text{CHO}$ , and this elementary reaction needs to overcome an activation barrier of  $94.9 \text{ kJ}\cdot\text{mol}^{-1}$  with the reaction energy of  $41.4$

$\text{kJ}\cdot\text{mol}^{-1}$ , and the rate constant is  $1.84\times 10^3 \text{ s}^{-1}$ ; in TS37,  $\text{CH}_2\text{CHO}$  is adsorbed at the bridge-SE-2 Co-Cu site, and H is adsorbed at atop-SE Co site; the distance between O and H atom is decreased to  $1.357 \text{ \AA}$  from  $2.685 \text{ \AA}$  in the initial state,  $\text{CH}_2\text{CHO}+\text{H}(2)$ .

Starting from  $\text{CH}_3\text{CO}$ , two possible hydrogenation pathways exist. One is  $\text{CH}_3\text{CO}$  hydrogenation to  $\text{CH}_3\text{CHO}$  (**R38**) via a transition state TS38, and this elementary reaction needs to overcome an activation barrier of  $57.1 \text{ kJ}\cdot\text{mol}^{-1}$  with the reaction energy of  $-14.0 \text{ kJ}\cdot\text{mol}^{-1}$ , and the rate constant is  $1.16\times 10^8 \text{ s}^{-1}$ ; in TS38,  $\text{CH}_3\text{CO}$  is adsorbed at the bridge-SE-2 Co-Cu site, and H species is adsorbed at the atop-SE site; the distance between  $\text{C}_1$  and H atom is decreased to  $1.157 \text{ \AA}$  from  $2.218 \text{ \AA}$  in the initial state,  $\text{CH}_3\text{CO}+\text{H}(1)$ . The other is  $\text{CH}_3\text{CO}$  hydrogenation to  $\text{CH}_3\text{COH}$  (**R39**) via a transition state TS39, which is less favorable than  $\text{CH}_3\text{CO}$  hydrogenation to  $\text{CH}_3\text{CHO}$ , and this elementary reaction needs to overcome an activation barrier of  $123.8 \text{ kJ}\cdot\text{mol}^{-1}$  with the reaction energy of  $58.7 \text{ kJ}\cdot\text{mol}^{-1}$ , and the rate constant is  $6.81 \text{ s}^{-1}$ ; in TS39,  $\text{CH}_3\text{CO}$  and H are adsorbed at the atop-SE Co site; the distance between O and H atom is decreased to  $1.403 \text{ \AA}$  from  $3.064 \text{ \AA}$  in the initial state,  $\text{CH}_3\text{CO}+\text{H}(2)$ .

As mentioned above, both  $\text{CH}_2\text{CHO}$  and  $\text{CH}_3\text{CO}$  prefer to be hydrogenated to  $\text{CH}_3\text{CHO}$ . Therefore,  $\text{CH}_3\text{CHO}$  further hydrogenation has also been calculated.  $\text{CH}_3\text{CHO}$  hydrogenation to  $\text{CH}_3\text{CH}_2\text{O}$  (**R40**) has an activation barrier of  $27.5 \text{ kJ}\cdot\text{mol}^{-1}$  with the reaction energy of  $10.4 \text{ kJ}\cdot\text{mol}^{-1}$ , and the rate constant is  $1.36\times 10^{10} \text{ s}^{-1}$ , which is much more favorable both thermodynamically and dynamically than  $\text{CH}_3\text{CHO}$  hydrogenation to  $\text{CH}_3\text{CHOH}$  (**R41**) with the activation barrier and reaction energy of  $112.8$  and  $57.1 \text{ kJ}\cdot\text{mol}^{-1}$ , respectively; in TS37,  $\text{CH}_3\text{CHO}$  is adsorbed at the bridge-SE-1 Co-Cu site, and H is adsorbed at the atop-SE Co site; the distance between  $\text{C}_1$  and H atom is decreased to  $1.469 \text{ \AA}$  from  $2.692 \text{ \AA}$  in the initial state,  $\text{CH}_3\text{CHO}+\text{H}(1)$ .

Finally,  $\text{CH}_3\text{CH}_2\text{O}$  hydrogenation to ethanol (**R42**) via TS42 is endothermic by  $48.6 \text{ kJ}\cdot\text{mol}^{-1}$



with an activation barrier of  $109.6 \text{ kJ}\cdot\text{mol}^{-1}$ , and the rate constant is  $5.16\times 10^2 \text{ s}^{-1}$ ; in TS38,  $\text{CH}_3\text{CH}_2\text{O}$  and H are adsorbed at the atop-SE Co sites; the distance between O and H atom is decreased to  $1.419 \text{ \AA}$  from  $2.496 \text{ \AA}$  in the initial state.

#### 4. Microkinetic modeling

Microkinetic modeling<sup>1-4</sup> has been widely employed to investigate the activity and selectivity of the catalyst, for example, Liu *et al.*<sup>2</sup> have proved that the water dissociation, which is considered as the rate-determining step for water-gas-shift reaction, run faster on Au and Cu nanoparticles than their parent bulk surfaces. Liu and Choi<sup>4</sup> have investigated the formation of ethanol from syngas on Rh(111) surface, suggesting that the productivity and selectivity for ethanol are only controlled by  $\text{CH}_4$  formation and the C–C bond formation via CO insertion into  $\text{CH}_3$ .

As a result, in this study, microkinetic modeling is implemented to probe into the catalytic activity and selectivity of major products in syngas conversion on CoCu(211) surface under the typical experimental conditions ( $P_{\text{CO}}=4 \text{ atm}$ ,  $P_{\text{H}_2}=8 \text{ atm}$ , and  $T=500\sim 600 \text{ K}$ ). All elementary reactions involved in the optimal formation pathways of  $\text{CH}_3\text{OH}$ ,  $\text{CH}_4$  and  $\text{C}_2\text{H}_5\text{OH}$ , as well as the corresponding reaction rates at the temperature of 500, 525, 550, 575 and 600 K used for the microkinetic modeling are summarized in Table S1.

**Table S1** All elementary reactions involved in the optimal formation pathways of  $\text{CH}_3\text{OH}$ ,  $\text{CH}_4$  and  $\text{C}_2\text{H}_5\text{OH}$ , as well as the corresponding reaction rate constants at the temperature of 500, 525, 550, 575 and 600 K used for the microkinetic modeling.

| Elementary Reactions                                | Rate constants $k \text{ (s}^{-1}\text{)}$ |                   |                   |                   |                   |                   |
|-----------------------------------------------------|--------------------------------------------|-------------------|-------------------|-------------------|-------------------|-------------------|
|                                                     | 500K                                       | 525K              | 550K              | 575K              | 600K              |                   |
| $\text{CO(g)}+*\leftrightarrow\text{CO}^*$          |                                            |                   |                   |                   |                   |                   |
| $\text{H}_2(\text{g})+*\leftrightarrow 2\text{H}^*$ |                                            |                   |                   |                   |                   |                   |
| $\text{CO}^*+\text{H}^*\rightarrow\text{CHO}^{**}$  | $k_3$                                      | $2.68\times 10^5$ | $8.50\times 10^5$ | $1.45\times 10^6$ | $4.06\times 10^6$ | $5.94\times 10^6$ |

|                                                                                                           |          |                       |                       |                       |                       |                       |
|-----------------------------------------------------------------------------------------------------------|----------|-----------------------|-----------------------|-----------------------|-----------------------|-----------------------|
| $\text{CHO}^* + \text{H}^* \rightarrow \text{CH}_2\text{O}^*$                                             | $k_4$    | $7.14 \times 10^8$    | $1.31 \times 10^9$    | $2.27 \times 10^9$    | $3.76 \times 10^9$    | $5.98 \times 10^9$    |
| $\text{CH}_2\text{O}^* + \text{H}^* \rightarrow \text{CH}_2^* + \text{OH}^*$                              | $k_5$    | $1.88 \times 10^3$    | $6.11 \times 10^3$    | $1.79 \times 10^4$    | $4.81 \times 10^4$    | $1.19 \times 10^5$    |
| $\text{CH}_2\text{O}^* + \text{H}^* \rightarrow \text{CH}_3\text{O}^* + ^*$                               | $k_6$    | $2.92 \times 10^{10}$ | $4.27 \times 10^{10}$ | $6.06 \times 10^{10}$ | $8.34 \times 10^{10}$ | $1.12 \times 10^{11}$ |
| $\text{CH}_3\text{O}^* + \text{H}^* \rightarrow \text{CH}_3^* + \text{OH}^*$                              | $k_7$    | $8.95 \times 10^3$    | $2.82 \times 10^4$    | $8.01 \times 10^4$    | $2.08 \times 10^5$    | $5.03 \times 10^5$    |
| $\text{CH}_3\text{O}^* + \text{H}^* \rightarrow \text{CH}_3\text{OH}(\text{g}) + 2^*$                     | $k_8$    | $5.01 \times 10^2$    | $1.75 \times 10^3$    | $5.44 \times 10^3$    | $1.54 \times 10^4$    | $4.00 \times 10^4$    |
| $\text{CH}_2^* + \text{H}^* \rightarrow \text{CH}_3^*$                                                    | $k_9$    | $6.09 \times 10^{10}$ | $7.90 \times 10^{10}$ | $1.00 \times 10^{11}$ | $1.25 \times 10^{11}$ | $1.53 \times 10^{11}$ |
| $\text{CH}_2^* + \text{CO}^* \rightarrow \text{CH}_2\text{CO}^* + ^*$                                     | $k_{10}$ | $9.07 \times 10^8$    | $1.49 \times 10^9$    | $2.35 \times 10^9$    | $3.56 \times 10^9$    | $5.22 \times 10^9$    |
| $\text{CH}_3^* + \text{H}^* \rightarrow \text{CH}_4(\text{g}) + 2^*$                                      | $k_{11}$ | $3.23 \times 10^4$    | $9.49 \times 10^4$    | $2.54 \times 10^5$    | $6.24 \times 10^5$    | $1.42 \times 10^6$    |
| $\text{CH}_3^* + \text{CO}^* \rightarrow \text{CH}_3\text{CO}^* + ^*$                                     | $k_{12}$ | $1.30 \times 10^5$    | $3.55 \times 10^5$    | $8.90 \times 10^5$    | $2.06 \times 10^6$    | $4.46 \times 10^6$    |
| $\text{CH}_2\text{CO}^* + \text{H}^* \rightarrow \text{CH}_3\text{CO}^* + ^*$                             | $k_{13}$ | $4.67 \times 10^7$    | $9.02 \times 10^7$    | $1.64 \times 10^8$    | $2.85 \times 10^8$    | $4.72 \times 10^8$    |
| $\text{CH}_2\text{CO}^* + \text{H}^* \rightarrow \text{CH}_2\text{CHO}^* + ^*$                            | $k_{14}$ | $3.11 \times 10^6$    | $6.38 \times 10^6$    | $1.23 \times 10^7$    | $2.24 \times 10^7$    | $3.89 \times 10^7$    |
| $\text{CH}_2\text{CHO}^* + \text{H}^* \rightarrow \text{CH}_3\text{CHO}^* + ^*$                           | $k_{15}$ | $1.36 \times 10^{10}$ | $2.36 \times 10^{10}$ | $3.91 \times 10^{10}$ | $6.20 \times 10^{10}$ | $9.49 \times 10^{10}$ |
| $\text{CH}_3\text{CO}^* + \text{H}^* \rightarrow \text{CH}_3\text{CHO}^* + ^*$                            | $k_{16}$ | $1.16 \times 10^8$    | $2.36 \times 10^8$    | $4.52 \times 10^8$    | $8.19 \times 10^8$    | $1.42 \times 10^8$    |
| $\text{CH}_3\text{CHO}^* + \text{H}^* \rightarrow \text{CH}_3\text{CH}_2\text{O}^* + ^*$                  | $k_{17}$ | $6.43 \times 10^{10}$ | $9.34 \times 10^{10}$ | $1.31 \times 10^{11}$ | $1.80 \times 10^{11}$ | $2.40 \times 10^{11}$ |
| $\text{CH}_3\text{CH}_2\text{O}^* + \text{H}^* \rightarrow \text{C}_2\text{H}_5\text{OH}(\text{g}) + 2^*$ | $k_{18}$ | $5.16 \times 10^2$    | $1.93 \times 10^3$    | $6.43 \times 10^3$    | $1.93 \times 10^4$    | $5.30 \times 10^4$    |
| $\text{OH}^* + \text{H}^* \rightarrow \text{H}_2\text{O}(\text{g}) + 2^*$                                 | $k_{19}$ | $9.03 \times 10^1$    | $3.44 \times 10^2$    | $1.16 \times 10^3$    | $3.55 \times 10^3$    | $9.87 \times 10^3$    |

The adsorption reactions of CO and H<sub>2</sub> were assumed in equilibrium. The equilibrium constants were obtained from the below equation:

$$K = \exp\left[-(\Delta E_{\text{ads}} - T\Delta S) / RT\right]$$

Where  $E_{\text{ads}}$  refers to the adsorption energy of CO or H<sub>2</sub>, and  $\Delta S$  is the entropy change from the gas phase at the reaction temperature, obtained from NIST Chemistry WebBook.<sup>5</sup>

$$\theta_{\text{CO}} = P_{\text{CO}} K_1 \theta^*$$

$$\theta_{\text{H}} = P_{\text{H}_2}^{1/2} K_2^{1/2} \theta^*$$

For the kinetics of surface reactions, we only consider forward reactions, which is a safe approximation at such high partial pressures of CO and H<sub>2</sub> as it is used in experiment.

The rate constants have been presented in Table 3 in the main text. The site balance of

intermediate species included in the reaction mechanism can be written in terms of coverage ( $\theta_X$ : X = surface species).

$$\begin{aligned} &\theta_{CO} + \theta_H + \theta_{CHO} + \theta_{CH_2O} + \theta_{CH_2} + \theta_{CH_3O} + \theta_{CH_3} + \theta_{CH_2CO} + \theta_{CH_2CHO} + \theta_{CH_3CO} + \theta_{CH_3CHO} \\ &+ \theta_{CH_3CH_2O} + \theta_{OH} + \theta^* = 1 \end{aligned} \quad (1)$$

The surface species including CHO, CH<sub>2</sub>O, CH<sub>2</sub>, CH<sub>3</sub>O, CH<sub>3</sub>, CH<sub>2</sub>CO, CH<sub>3</sub>CO, CH<sub>3</sub>CHO, CH<sub>3</sub>CH<sub>2</sub>O, and OH were described according to the pseudo steady-state approximation,<sup>1</sup> which states that the production rate and consumption rate are equal for all intermediates:

$$1. \text{ CHO: } \frac{d\theta_{CHO}}{dt} = k_3\theta_{CO}\theta_H - k_4\theta_{CHO}\theta_H = 0 \quad (2)$$

$$2. \text{ CH}_2\text{O: } \frac{d\theta_{CH_2O}}{dt} = k_4\theta_{CHO}\theta_H - k_5\theta_{CH_2O}\theta_H - k_6\theta_{CH_2O}\theta_H = 0 \quad (3)$$

$$3. \text{ CH}_2: \frac{d\theta_{CH_2}}{dt} = k_5\theta_{CH_2O}\theta_H - k_9\theta_{CH_2}\theta_H - k_{10}\theta_{CH_2}\theta_{CO} = 0 \quad (4)$$

$$4. \text{ CH}_3\text{O: } \frac{d\theta_{CH_3O}}{dt} = k_6\theta_{CH_2O}\theta_H - k_7\theta_{CH_3O}\theta_H - k_8\theta_{CH_3O}\theta_H = 0 \quad (5)$$

$$5. \text{ CH}_3: \frac{d\theta_{CH_3}}{dt} = k_7\theta_{CH_3O}\theta_H + k_9\theta_{CH_2}\theta_H - k_{11}\theta_{CH_3}\theta_H - k_{12}\theta_{CH_3}\theta_{CO} = 0 \quad (6)$$

$$6. \text{ CH}_2\text{CO: } \frac{d\theta_{CH_2CO}}{dt} = k_{10}\theta_{CH_2}\theta_{CO} - k_{13}\theta_{CH_2CO}\theta_H - k_{14}\theta_{CH_2CO}\theta_H = 0 \quad (7)$$

$$7. \text{ CH}_2\text{CHO: } \frac{d\theta_{CH_2CHO}}{dt} = k_{14}\theta_{CH_2CO}\theta_H - k_{15}\theta_{CH_2CHO}\theta_H = 0 \quad (8)$$

$$8. \text{ CH}_3\text{CO: } \frac{d\theta_{CH_3CO}}{dt} = k_{12}\theta_{CH_3}\theta_{CO} + k_{13}\theta_{CH_2CO}\theta_H - k_{16}\theta_{CH_3CO}\theta_H = 0 \quad (9)$$

$$9. \text{ CH}_3\text{CHO: } \frac{d\theta_{CH_3CHO}}{dt} = k_{15}\theta_{CH_2CHO}\theta_H + k_{16}\theta_{CH_3CO}\theta_H - k_{17}\theta_{CH_3CHO}\theta_H = 0 \quad (10)$$

$$10. \text{ CH}_3\text{CH}_2\text{O: } \frac{d\theta_{CH_3CH_2O}}{dt} = k_{17}\theta_{CH_3CHO}\theta_H - k_{18}\theta_{CH_3CH_2O}\theta_H = 0 \quad (11)$$

$$11. \text{ OH: } \frac{d\theta_{OH}}{dt} = k_5\theta_{CH_2O}\theta_H + k_7\theta_{CH_3O}\theta_H - k_{19}\theta_{OH}\theta_H = 0 \quad (12)$$

By putting all of the coverage expressions (equations (2)~(12)) into equation (1), we can calculate the coverage of surface free sites  $\theta^*$ . Subsequently, the coverage of all intermediates can be obtained.

The rates for each major product ( $\text{CH}_3\text{OH}$ ,  $\text{CH}_4$  and  $\text{CH}_3\text{CH}_2\text{OH}$ ) are  $r_{\text{CH}_3\text{OH}} = k_8 \theta_{\text{CH}_3\text{O}} \theta_H$ ;  $r_{\text{CH}_4} = k_{11} \theta_{\text{CH}_3} \theta_H$ ;  $r_{\text{CH}_3\text{CH}_2\text{OH}} = k_{18} \theta_{\text{CH}_3\text{CH}_2\text{O}} \theta_H$ , respectively.

## 5. Differential charge density

In order to explain the electronic properties of Cu-Co catalysts, we have investigated the differential charge density of Cu atom over Cu(211) surface, Co atom and its surrounding Cu atoms over CoCu(211) surface. The differential charge density<sup>6</sup> can be written in equation form as:

$$\Delta\rho = \rho_{\text{full surface}} - \rho_{\text{surface with vacancy}} - \rho_{\text{atom}}$$

Where the  $\rho_{\text{full surface}}$  refers to the charge density of Cu atoms of Cu(211) surface and CoCu(211) surface.  $\rho_{\text{surface with vacancy}}$  and  $\rho_{\text{atom}}$  refer to the charge densities of these defective systems and that of the lone Co atom ( $\rho_{\text{atom}}$ ) that is removed, then, it is calculated and compared to the charge densities of the metals without the full surface.

## References:

- [1] P. Liu, A. Logadottir, J. K. Nørskov, *Electrochim. Acta*, 2003, **48**, 3731–3742.
- [2] P. Liu, J. A. Rodriguez, *J. Chem. Phys.*, 2007, **126**, 164705-1–8.
- [3] P. Liu, J. A. Rodriguez, *J. Phys. Chem. B*, 2006, **110**, 19418–19425.
- [4] Y. M. Choi, P. Liu, *J. Am. Chem. Soc.*, 2009, **36**, 13054–13061.
- [5] <http://webbook.nist.gov/chemistry/>.
- [6] G. Collinge, Y. Z. Xiang, R. Barbosa, J. S. McEwen, N. Kruse, *Surf. Sci.*, 2016, **648**, 74–83.
